# Supplementary material
Source: PubMed Central journal article supplement (PMC1756907)

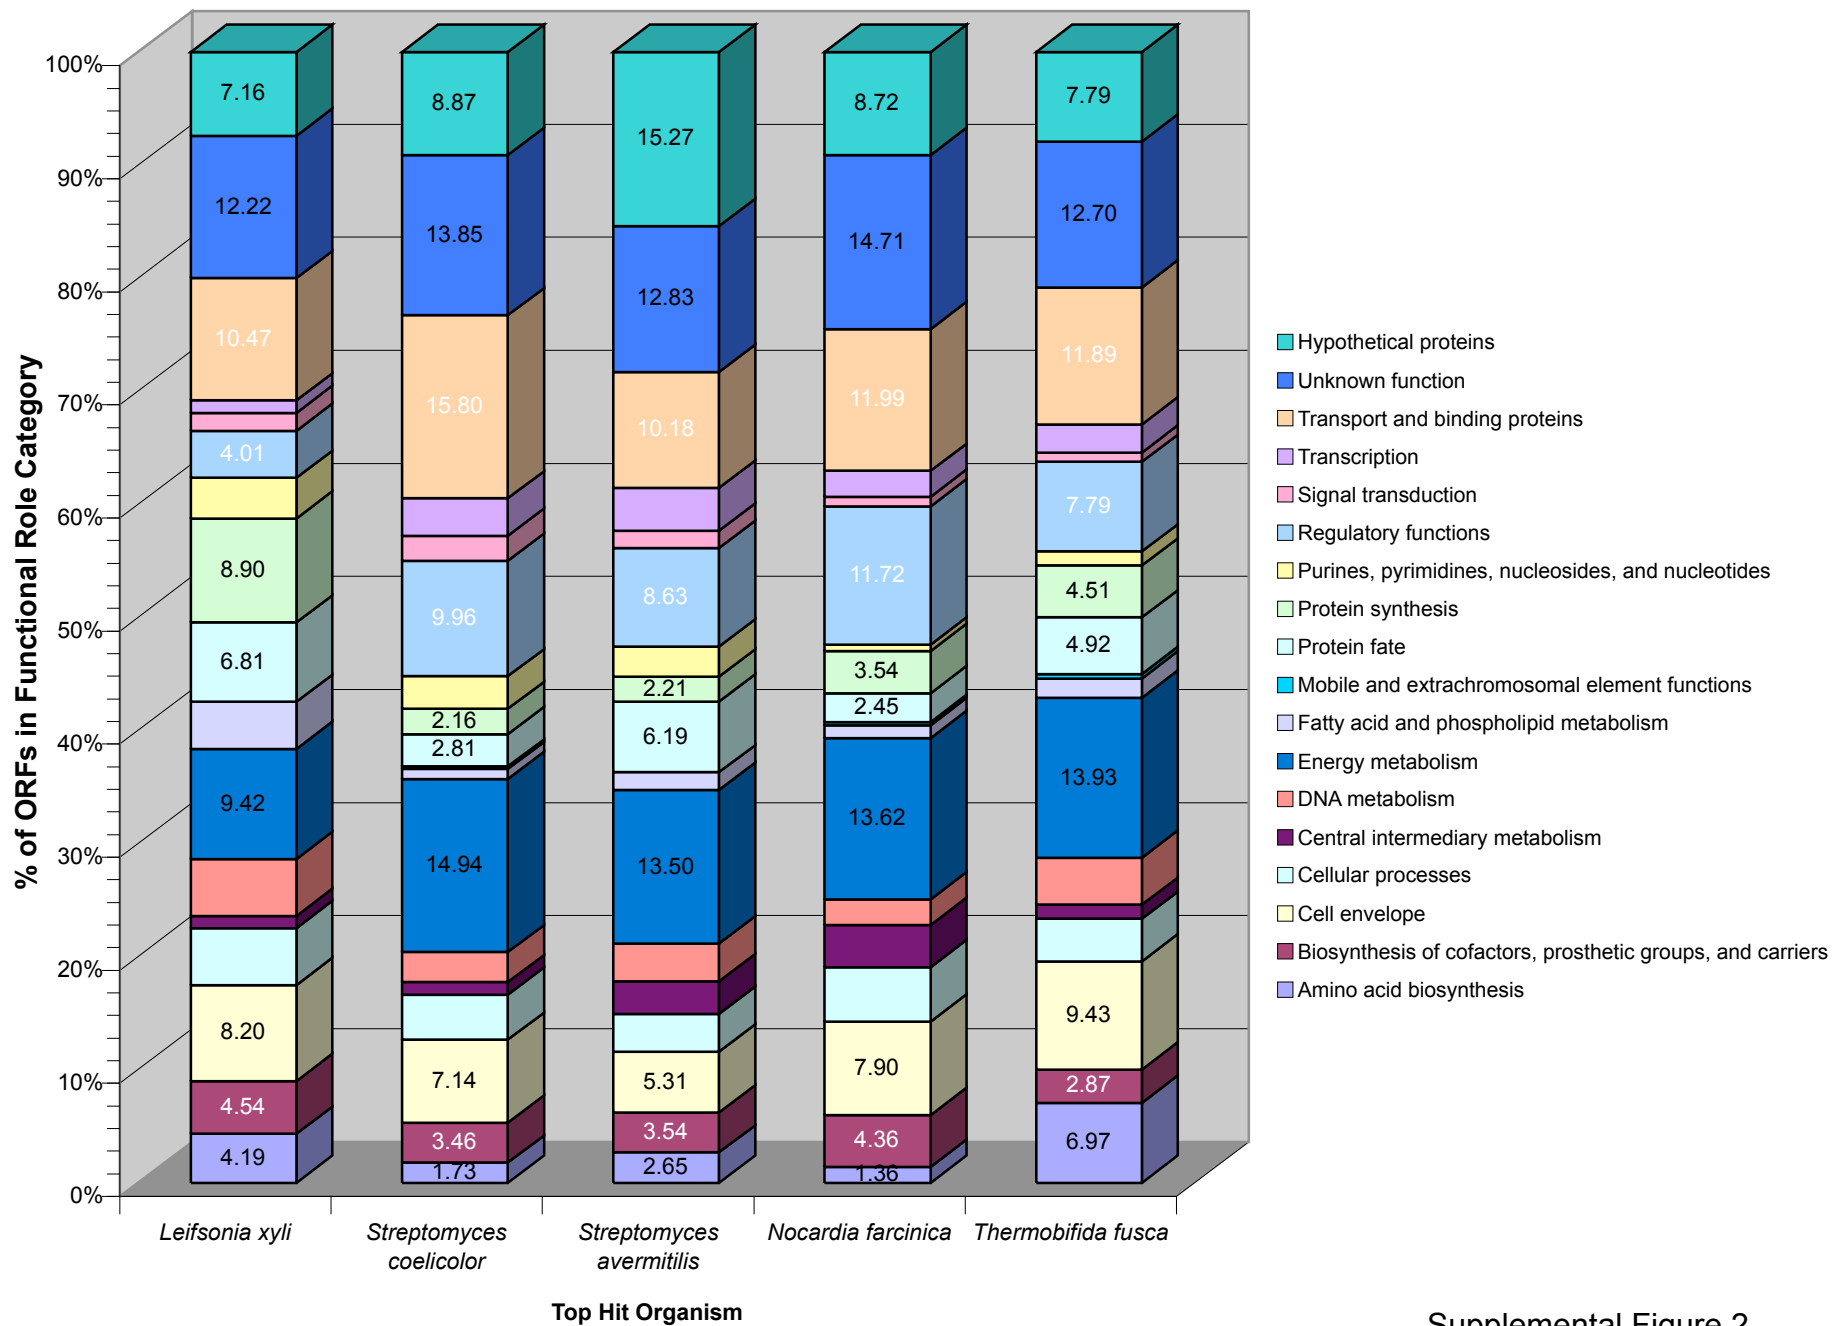

Supplemental Figure 2

Supplement: pgen.0020214.sg002.pdf [file pgen.0020214.sg002.pdf]

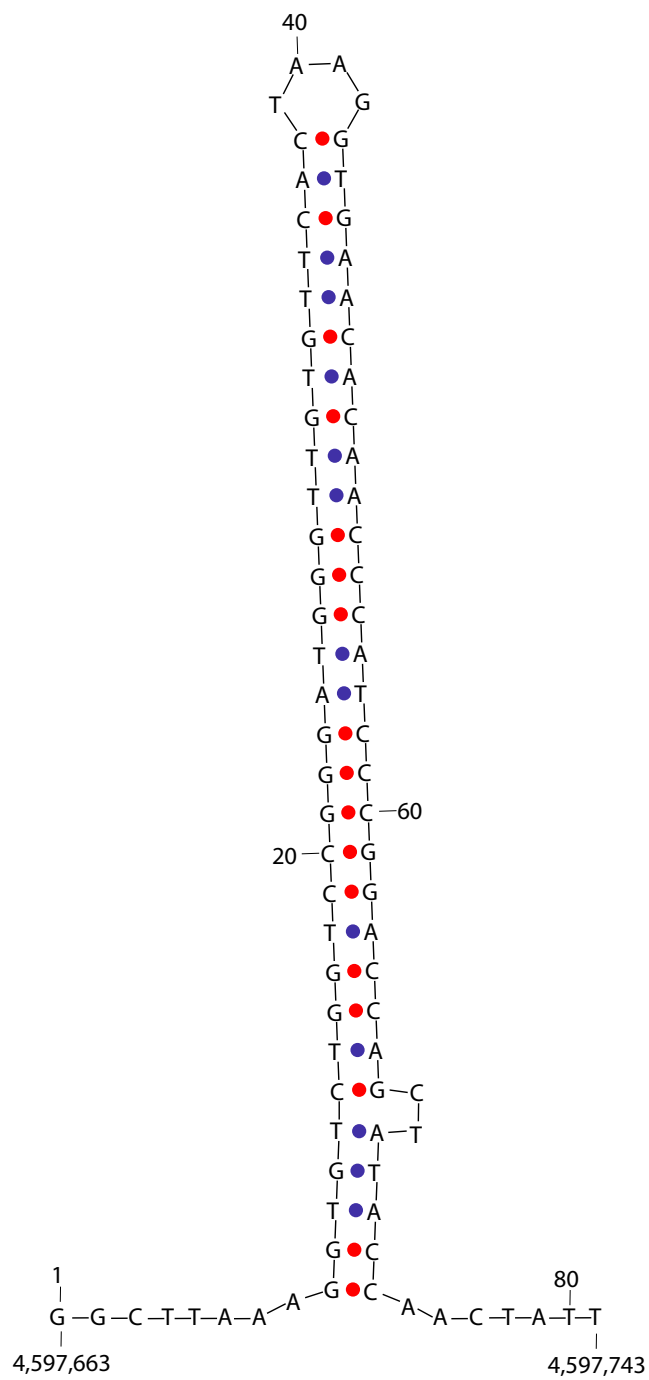

Supplemental Figure 3

Supplement: pgen.0020214.sg003.pdf [file pgen.0020214.sg003.pdf]
